# Supplementary material for: Nuclear Deformation in Response to Mechanical Confinement is Cell Type Dependent
Source: MDPI journal article supplement (doi:10.3390/cells8050427), 2019-05-08
Supplement: s1 [file s1]

Supplementary Material for

**Nuclear Deformation in Response to Mechanical Confinement is Cell Type Dependent**

\*Mary T. Doolin<sup>1</sup>, \*Thea S. Ornstein<sup>1</sup>, Kimberly M. Stroka<sup>1,2,3,4</sup>

<sup>1</sup>Fischell Department of Bioengineering, University of Maryland, College Park, MD, 20742, USA

<sup>2</sup>Biophysics Program, University of Maryland, College Park, MD, 20742, USA

<sup>3</sup>Center for Stem Cell Biology and Regenerative Medicine, University of Maryland – Baltimore, MD, 21201, USA

<sup>4</sup>Marlene and Stewart Greenebaum Comprehensive Cancer Center, University of Maryland – Baltimore, MD, 21201, USA

**Table S1.** Statistics for nucleus area for MSCs, L929 cells, and MDA-MB-231 cells, ns=not significant, \*p<0.05, \*\*p<0.005, \*\*\*\*p<0.0001.

| Area                   | MSC  | L929 | MDAMB231 |
|------------------------|------|------|----------|
| 3 vs 6 $\mu\text{m}$   | ns   | ns   | ****     |
| 3 vs 10 $\mu\text{m}$  | ns   | **** | ****     |
| 3 vs 20 $\mu\text{m}$  | **** | **** | ****     |
| 3 vs 50 $\mu\text{m}$  | **** | **** | ****     |
| 6 vs 10 $\mu\text{m}$  | ns   | ns   | **       |
| 6 vs 20 $\mu\text{m}$  | **** | *    | ****     |
| 6 vs 50 $\mu\text{m}$  | **** | **** | ****     |
| 10 vs 20 $\mu\text{m}$ | **** | ns   | *        |
| 10 vs 50 $\mu\text{m}$ | **** | **** | ****     |
| 20 vs 50 $\mu\text{m}$ | ns   | ns   | ns       |

**Table S2.** Statistics for nucleus minor axis for MSCs, L929 cells, and MDA-MB-231 cells, ns=not significant, \*p<0.05, \*\*p<0.005, \*\*\*p<0.0005, \*\*\*\*p<0.0001.

| Minor axis             | MSC  | L929 | MDAMB231 |
|------------------------|------|------|----------|
| 3 vs 6 $\mu\text{m}$   | ns   | ns   | **       |
| 3 vs 10 $\mu\text{m}$  | **** | **** | ****     |
| 3 vs 20 $\mu\text{m}$  | **** | **** | ****     |
| 3 vs 50 $\mu\text{m}$  | **** | **** | ****     |
| 6 vs 10 $\mu\text{m}$  | **** | ***  | ****     |
| 6 vs 20 $\mu\text{m}$  | **** | **** | ****     |
| 6 vs 50 $\mu\text{m}$  | **** | **** | ****     |
| 10 vs 20 $\mu\text{m}$ | **** | ns   | **       |
| 10 vs 50 $\mu\text{m}$ | **** | **** | ****     |
| 20 vs 50 $\mu\text{m}$ | *    | **** | ns       |

**Table S3.** Statistics for nucleus major axis for MSCs, L929 cells, and MDA-MB-231 cells, ns=not significant, \*p<0.05, \*\*p<0.005, \*\*\*p<0.0005, \*\*\*\*p<0.0001.

| Major axis             | MSC | L929 | MDAMB231 |
|------------------------|-----|------|----------|
| 3 vs 6 $\mu\text{m}$   | ns  | ns   | ****     |
| 3 vs 10 $\mu\text{m}$  | ns  | **** | ns       |
| 3 vs 20 $\mu\text{m}$  | ns  | **** | ns       |
| 3 vs 50 $\mu\text{m}$  | ns  | **** | ***      |
| 6 vs 10 $\mu\text{m}$  | ns  | **** | ***      |
| 6 vs 20 $\mu\text{m}$  | ns  | *    | ****     |
| 6 vs 50 $\mu\text{m}$  | *   | **** | ***      |
| 10 vs 20 $\mu\text{m}$ | ns  | ns   | ns       |
| 10 vs 50 $\mu\text{m}$ | **  | ns   | ns       |
| 20 vs 50 $\mu\text{m}$ | *** | ns   | ns       |

**Table S4.** Statistics for MSC nucleus dimensions ns = not significant, \*\*p<0.005, \*\*\*\*p<0.0001.

|                        | Width | Length | Height |
|------------------------|-------|--------|--------|
| 3 vs 6 $\mu\text{m}$   | ns    | ns     | ns     |
| 3 vs 10 $\mu\text{m}$  | ns    | ns     | ns     |
| 3 vs 20 $\mu\text{m}$  | **    | ns     | ns     |
| 3 vs 50 $\mu\text{m}$  | ****  | ns     | ns     |
| 6 vs 10 $\mu\text{m}$  | ns    | ns     | ns     |
| 6 vs 20 $\mu\text{m}$  | ns    | ns     | ns     |
| 6 vs 50 $\mu\text{m}$  | **    | ns     | ns     |
| 10 vs 20 $\mu\text{m}$ | ns    | ns     | ns     |
| 10 vs 50 $\mu\text{m}$ | ns    | ns     | ns     |
| 20 vs 50 $\mu\text{m}$ | ns    | ns     | ns     |

**Table S5.** Statistics for MSC nucleus dimensions ns = not significant, \*p<0.05, \*\*p<0.005, \*\*\*p<0.0005, \*\*\*\*p<0.0001.

|                   | Channel width (μm) |      |      |      |      |
|-------------------|--------------------|------|------|------|------|
|                   | 3                  | 6    | 10   | 20   | 50   |
| Width vs. length  | ****               | **** | **** | *    | ns   |
| Width vs. height  | ns                 | ns   | ns   | ns   | **** |
| Length vs. height | ***                | *    | **** | **** | **** |

**Table S6.** Statistics for L929 nucleus dimensions ns = not significant, \*p<0.05, \*\*p<0.005, \*\*\*p<0.0005, \*\*\*\*p<0.0001.

|             | Width | Length | Height |
|-------------|-------|--------|--------|
| 3 vs 6 μm   | ns    | ns     | ns     |
| 3 vs 10 μm  | ns    | ns     | ns     |
| 3 vs 20 μm  | ****  | **     | ns     |
| 3 vs 50 μm  | ****  | **     | ns     |
| 6 vs 10 μm  | ns    | ns     | ns     |
| 6 vs 20 μm  | ****  | ns     | ns     |
| 6 vs 50 μm  | ***   | ns     | ns     |
| 10 vs 20 μm | *     | ns     | ns     |
| 10 vs 50 μm | ns    | ns     | ns     |
| 20 vs 50 μm | ns    | ns     | ns     |

**Table S7.** Statistics for L929 nucleus dimensions ns = not significant, \*p<0.05, \*\*p<0.005, \*\*\*p<0.0005, \*\*\*\*p<0.0001.

|                   | Channel width (μm) |      |      |    |    |
|-------------------|--------------------|------|------|----|----|
|                   | 3                  | 6    | 10   | 20 | 50 |
| Width vs. length  | ****               | **** | **** | ns | ns |
| Width vs. height  | **                 | **   | ns   | ns | ns |
| Length vs. height | ***                | ns   | **   | ns | ns |

**Table S8.** Statistics for MSC nucleus dimensions when treated with 10 μM nocodazole or vehicle control ns = not significant, \*\*p<0.005, \*\*\*p<0.0005, \*\*\*\*p<0.0001.

|            |                | Channel width (μm) |      |     |      |      |
|------------|----------------|--------------------|------|-----|------|------|
| Comparison |                | 3                  | 6    | 10  | 20   | 50   |
| Control    | W vs. L        | ***                | ns   | *** | ns   | ns   |
|            | W vs. H        | ns                 | ns   | ns  | ns   | ***  |
|            | L vs. H        | ns                 | ns   | *** | **** | **** |
| Nocodazole | W vs. L        | ****               | **** | **  | ns   | ns   |
|            | W vs. H        | ns                 | ns   | ns  | ns   | **   |
|            | L vs. H        | ns                 | ns   | ns  | **   | **** |
| W          | Cont. vs. Noc. | ns                 | ns   | ns  | ns   | ns   |
| L          | Cont. vs. Noc. | ns                 | ns   | ns  | ns   | ns   |
| H          | Cont. vs. Noc. | ns                 | ns   | ns  | ns   | ns   |

**Table S9.** Statistics for MSC nucleus dimensions when treated with 10  $\mu$ M nocodazole or vehicle control ns = not significant, \*\*p<0.005.

|            |                   | Dimension |    |    |
|------------|-------------------|-----------|----|----|
| Comparison |                   | W         | L  | H  |
| Control    | 3 vs. 6 $\mu$ m   | ns        | ns | ns |
|            | 3 vs. 10 $\mu$ m  | ns        | ns | ns |
|            | 3 vs. 20 $\mu$ m  | ns        | ns | ns |
|            | 3 vs. 50 $\mu$ m  | ns        | ns | ns |
|            | 6 vs. 10 $\mu$ m  | ns        | ns | ns |
|            | 6 vs. 20 $\mu$ m  | ns        | ns | ns |
|            | 6 vs. 50 $\mu$ m  | ns        | ns | ns |
|            | 10 vs. 20 $\mu$ m | ns        | ns | ns |
|            | 10 vs. 50 $\mu$ m | ns        | ns | ns |
|            | 20 vs. 50 $\mu$ m | ns        | ns | ns |
| Nocodazole | 3 vs. 6 $\mu$ m   | ns        | ns | ns |
|            | 3 vs. 10 $\mu$ m  | ns        | ns | ns |
|            | 3 vs. 20 $\mu$ m  | ns        | ns | ns |
|            | 3 vs. 50 $\mu$ m  | ns        | ns | ns |
|            | 6 vs. 10 $\mu$ m  | ns        | ns | ns |
|            | 6 vs. 20 $\mu$ m  | ns        | ns | ns |
|            | 6 vs. 50 $\mu$ m  | **        | ns | ns |
|            | 10 vs. 20 $\mu$ m | ns        | ns | ns |
|            | 10 vs. 50 $\mu$ m | ns        | ns | ns |
|            | 20 vs. 50 $\mu$ m | ns        | ns | ns |

**Table S10.** Statistics for L929 cell nucleus dimensions when treated with 10  $\mu$ M nocodazole or vehicle control ns = not significant, \*p<0.05, \*\*p<0.005, \*\*\*p<0.0005, \*\*\*\*p<0.0001.

|            |                | Channel width ( $\mu$ m) |      |    |    |     |
|------------|----------------|--------------------------|------|----|----|-----|
| Comparison |                | 3                        | 6    | 10 | 20 | 50  |
| Control    | W vs. L        | ****                     | **** | ** | ns | ns  |
|            | W vs. H        | ns                       | ns   | ns | ns | ns  |
|            | L vs. H        | ns                       | **   | ** | ns | *** |
| Nocodazole | W vs. L        | ****                     | ***  | ns | ns | ns  |
|            | W vs. H        | ns                       | ns   | ns | ns | ns  |
|            | L vs. H        | *                        | ns   | ns | ns | ns  |
| W          | Cont. vs. Noc. | ns                       | ns   | ns | ns | ns  |
| L          | Cont. vs. Noc. | ns                       | ns   | ns | ns | ns  |
| H          | Cont. vs. Noc. | ns                       | ns   | ns | ns | ns  |

**Table S11.** Statistics for L929 cell nucleus dimensions when treated with 10  $\mu$ M nocodazole or vehicle control ns = not significant, \*p<0.05, \*\*\*p<0.0005, \*\*\*\*p<0.0001.

|            |                   | Dimension |    |    |
|------------|-------------------|-----------|----|----|
| Comparison |                   | W         | L  | H  |
| Control    | 3 vs. 6 $\mu$ m   | ns        | ns | ns |
|            | 3 vs. 10 $\mu$ m  | ns        | ns | ns |
|            | 3 vs. 20 $\mu$ m  | ns        | ns | ns |
|            | 3 vs. 50 $\mu$ m  | ns        | ns | ns |
|            | 6 vs. 10 $\mu$ m  | ns        | ns | ns |
|            | 6 vs. 20 $\mu$ m  | ns        | ns | ns |
|            | 6 vs. 50 $\mu$ m  | ns        | ns | ns |
|            | 10 vs. 20 $\mu$ m | ns        | ns | ns |
|            | 10 vs. 50 $\mu$ m | ns        | ns | ns |
|            | 20 vs. 50 $\mu$ m | ns        | ns | ns |
| Nocodazole | 3 vs. 6 $\mu$ m   | ns        | ns | ns |
|            | 3 vs. 10 $\mu$ m  | ns        | ns | ns |
|            | 3 vs. 20 $\mu$ m  | ***       | ns | ns |
|            | 3 vs. 50 $\mu$ m  | ****      | ns | ns |
|            | 6 vs. 10 $\mu$ m  | ns        | ns | ns |
|            | 6 vs. 20 $\mu$ m  | ns        | ns | ns |
|            | 6 vs. 50 $\mu$ m  | *         | ns | ns |
|            | 10 vs. 20 $\mu$ m | ns        | ns | ns |
|            | 10 vs. 50 $\mu$ m | ns        | ns | ns |
|            | 20 vs. 50 $\mu$ m | ns        | ns | ns |

**Table S12.** Statistics for MSC nucleus dimensions when treated with 50  $\mu$ M blebbistatin or vehicle control ns = not significant, \*p<0.05, \*\*p<0.005, \*\*\*p<0.0005, \*\*\*\*p<0.0001.

|              |                 | Channel width ( $\mu$ m) |    |    |      |      |
|--------------|-----------------|--------------------------|----|----|------|------|
| Comparison   |                 | 3                        | 6  | 10 | 20   | 50   |
| Control      | W vs. L         | ****                     | *  | ns | ns   | ns   |
|              | W vs. H         | ns                       | ns | ns | ns   | ns   |
|              | L vs. H         | ns                       | ns | ns | ***  | **** |
| Blebbistatin | W vs. L         | ****                     | ** | ** | ns   | ns   |
|              | W vs. H         | **                       | ns | ns | ns   | **   |
|              | L vs. H         | *                        | ns | *  | **** | **** |
| W            | Cont. vs. Bleb. | ns                       | ns | ns | ns   | ns   |
| L            | Cont. vs. Bleb. | ns                       | ns | ns | ns   | ns   |
| H            | Cont. vs. Bleb. | ns                       | ns | ns | ns   | ns   |

**Table S13.** Statistics for MSC nucleus dimensions when treated with 50  $\mu$ M blebbistatin or vehicle control ns = not significant, \*\*p<0.005, \*\*\*p<0.0005, \*\*\*\*p<0.0001.

|              |                   | Dimension |    |    |
|--------------|-------------------|-----------|----|----|
| Comparison   |                   | W         | L  | H  |
| Control      | 3 vs. 6 $\mu$ m   | ns        | ns | ns |
|              | 3 vs. 10 $\mu$ m  | ns        | ns | ns |
|              | 3 vs. 20 $\mu$ m  | **        | ns | ns |
|              | 3 vs. 50 $\mu$ m  | ***       | ns | ns |
|              | 6 vs. 10 $\mu$ m  | ns        | ns | ns |
|              | 6 vs. 20 $\mu$ m  | ns        | ns | ns |
|              | 6 vs. 50 $\mu$ m  | ns        | ns | ns |
|              | 10 vs. 20 $\mu$ m | ns        | ns | ns |
|              | 10 vs. 50 $\mu$ m | ns        | ns | ns |
|              | 20 vs. 50 $\mu$ m | ns        | ns | ns |
| Blebbistatin | 3 vs. 6 $\mu$ m   | ns        | ns | ns |
|              | 3 vs. 10 $\mu$ m  | ns        | ns | ns |
|              | 3 vs. 20 $\mu$ m  | ns        | ns | ns |
|              | 3 vs. 50 $\mu$ m  | ****      | ns | ns |
|              | 6 vs. 10 $\mu$ m  | ns        | ns | ns |
|              | 6 vs. 20 $\mu$ m  | ns        | ns | ns |
|              | 6 vs. 50 $\mu$ m  | ns        | ns | ns |
|              | 10 vs. 20 $\mu$ m | ns        | ns | ns |
|              | 10 vs. 50 $\mu$ m | ns        | ns | ns |
|              | 20 vs. 50 $\mu$ m | ns        | ns | ns |

**Table S14.** Statistics for L929 cell nucleus dimensions when treated with 50  $\mu$ M blebbistatin or vehicle control ns = not significant, \*p<0.05, \*\*\*p<0.0005, \*\*\*\*p<0.0001.

|              |                 | Channel width ( $\mu$ m) |      |      |    |    |
|--------------|-----------------|--------------------------|------|------|----|----|
| Comparison   |                 | 3                        | 6    | 10   | 20 | 50 |
| Control      | W vs. L         | ****                     | **** | ***  | ns | ns |
|              | W vs. H         | ns                       | ns   | ns   | ns | ns |
|              | L vs. H         | ****                     | ***  | *    | ns | *  |
| Blebbistatin | W vs. L         | ****                     | **** | **** | ns | ns |
|              | W vs. H         | ***                      | *    | ns   | ns | ns |
|              | L vs. H         | ns                       | ns   | *    | *  | *  |
| W            | Cont. vs. Bleb. | ns                       | ns   | ns   | ns | ns |
| L            | Cont. vs. Bleb. | ns                       | ns   | ns   | ns | ns |
| H            | Cont. vs. Bleb. | ns                       | ns   | ns   | ns | ns |

**Table S15.** Statistics for L929 cell nucleus dimensions when treated with 50  $\mu$ M blebbistatin or vehicle control  
ns = not significant, \* $p < 0.05$ , \*\* $p < 0.005$ , \*\*\*\* $p < 0.0001$ .

|              |                   | Dimension |    |    |
|--------------|-------------------|-----------|----|----|
| Comparison   |                   | W         | L  | H  |
| Control      | 3 vs. 6 $\mu$ m   | ns        | ns | ns |
|              | 3 vs. 10 $\mu$ m  | ns        | ns | ns |
|              | 3 vs. 20 $\mu$ m  | **        | ns | ns |
|              | 3 vs. 50 $\mu$ m  | ns        | ns | ns |
|              | 6 vs. 10 $\mu$ m  | ns        | ns | ns |
|              | 6 vs. 20 $\mu$ m  | ns        | ns | ns |
|              | 6 vs. 50 $\mu$ m  | ns        | ns | ns |
|              | 10 vs. 20 $\mu$ m | ns        | ns | ns |
|              | 10 vs. 50 $\mu$ m | ns        | ns | ns |
|              | 20 vs. 50 $\mu$ m | ns        | ns | ns |
| Blebbistatin | 3 vs. 6 $\mu$ m   | ns        | ns | ns |
|              | 3 vs. 10 $\mu$ m  | ns        | ns | ns |
|              | 3 vs. 20 $\mu$ m  | *         | ns | ns |
|              | 3 vs. 50 $\mu$ m  | ****      | ns | ns |
|              | 6 vs. 10 $\mu$ m  | ns        | ns | ns |
|              | 6 vs. 20 $\mu$ m  | ns        | ns | ns |
|              | 6 vs. 50 $\mu$ m  | **        | ns | ns |
|              | 10 vs. 20 $\mu$ m | ns        | ns | ns |
|              | 10 vs. 50 $\mu$ m | ns        | ns | ns |
|              | 20 vs. 50 $\mu$ m | ns        | ns | ns |

**Supplemental Movies:** For all movies, the first frame represents the x-y plane, and the nucleus (stained with Hoechst) revolves around the y-axis. Stacks were thresholded and cut according to the workflow described in Figure 2 before being rendered in ImageJ. All scale bars on movies are in  $\mu$ m.

**Movie S1.** 3D rendering of MSC nucleus in 3  $\mu$ m channel.

**Movie S2.** 3D rendering of L929 nucleus in 3  $\mu$ m channel.

**Movie S3.** 3D rendering of MSC nucleus in 50  $\mu$ m channel.

**Movie S4.** 3D rendering of L929 nucleus in 50  $\mu$ m channel (center cell).

**Movie S5.** 3D rendering of MSC nucleus in 3  $\mu$ m channel treated with vehicle control.

**Movie S6.** 3D rendering of MSC nucleus in 3  $\mu$ m channel treated with nocodazole.

**Movie S7.** 3D rendering of L929 nucleus in 3  $\mu$ m channel treated with vehicle control.

**Movie S8.** 3D rendering of L929 nucleus in 3  $\mu$ m channel treated with nocodazole.

**Movie S9.** 3D rendering of MSC nucleus in 50  $\mu$ m channel treated with vehicle control.

**Movie S10.** 3D rendering of MSC nucleus in 50  $\mu$ m channel treated with nocodazole.

**Movie S11.** 3D rendering of L929 nucleus in 50  $\mu$ m channel treated with vehicle control (bottom right cell).

**Movie S12.** 3D rendering of L929 nucleus in 50  $\mu$ m channel treated with nocodazole (top cell).

**Movie S13.** 3D rendering of MSC nucleus in 3  $\mu$ m channel treated with vehicle control.

**Movie S14.** 3D rendering of MSC nucleus in 3  $\mu$ m channel treated with blebbistatin.

**Movie S15.** 3D rendering of L929 nucleus in 3  $\mu$ m channel treated with vehicle control.

**Movie S16.** 3D rendering of L929 nucleus in 3  $\mu$ m channel treated with blebbistatin.

**Movie S17.** 3D rendering of MSC nucleus in 50  $\mu\text{m}$  channel treated with vehicle control.

**Movie S18.** 3D rendering of MSC nucleus in 50  $\mu\text{m}$  channel treated with blebbistatin.

**Movie S19.** 3D rendering of L929 nucleus in 50  $\mu\text{m}$  channel treated with vehicle control.

**Movie S20.** 3D rendering of L929 nucleus in 50  $\mu\text{m}$  channel treated with blebbistatin.
